*In Defense of the Indians: The Defense of the Most Reverend Lord, Don Fray Bartolomé de Las Casas, of the Order of Preachers, Late Bishop of Chiapa, Against the Persecutors and Slanderers of the Peoples of the New World Discovered Across the Seas.* By BARTOLOMÉ DE LAS CASAS. Translated and edited by STAFFORD POOLE, C. M. De Kalb, 1974. Northern Illinois University Press. Illustrations. Pp. xx, 385. Cloth. \$25.00.

*All Mankind is One: A Study of the Disputation Between Bartolomé de Las Casas and Juan Ginés de Sepúlveda in 1550 on the Intellectual and Religious Capacity of the American Indians.* By LEWIS HANKE. DeKalb, 1974. Northern Illinois University Press. Illustrations. Appendices. Bibliography. Index. Pp. xvi, 205. Cloth. \$15.00.

El manuscrito que ha servido para la edición de esta obra de Fray Bartolomé de las Casas era conocido desde hace mucho tiempo, pero no había sido publicado hasta hoy. Contiene en 63 capítulos la doctrina que Las Casas opuso a Ginés de Sepúlveda en las célebres disputas de Valladolid (1550–51) que tuvieron por fin—según el resumen oficial de las mismas—“inquirir y constituir la forma y leyes cómo nuestra santa fe católica se pueda predicar y promulgar en aquel nuevo orbe que Dios nos ha descubierto”; en particular, “si es lícito a Su Magestad hacer guerra a aquellos indios antes que se les predique la fe, para sujetarlos a su imperio, y que después de sujetados puedan más fácil y comodamente ser enseñados y alumbrados por la doctrina evangélica.” Sepúlveda opinó que esto no sólo era lícito sino conveniente; mientras Las Casas se opuso vigorosamente a tal opinión, tachándola de ilícita y anticristiana. Sus principales razonamientos se encuentran también en otros de sus escritos, pero sólo el presente tratado los expone de manera completa y sistemática. Además, constituye una de las muestras más reveladoras de los métodos lascasianos de discusión.

El padre Stafford Poole ha realizado una gran labor al completar la versión inglesa del texto latino-único que se conoce—anotarla y editarla. Parece que ha logrado superar con general acierto las dificultades del latín lascasiano. Algunos pasajes todavía oscuros espero que acaben de ser aclarados en la edición bilingüe—latín y castellano—que está siendo preparada en México. Es utilísima la nota preliminar en que explica la manera de identificar las citas de Las Casas, especialmente las procedentes de los códigos del derecho canónico y civil, que son muy numerosas. Completa o rectifica asimismo, en el curso

de la obra, tales citas, pues Las Casas suele hacerlas en forma muy concisa y a veces equivocada. Identifica también a muchos de los autores y obras citadas, trabajo sin el cual sería muy difícil de entender la argumentación de Las Casas. Quizá esta identificación, que el padre Poole hace en notas a cada capítulo, colocadas al final del volumen, pudo ser sustituida con ventaja por una lista alfabética y más completa de tales autores y escritos citados en el tratado lascasiano. Un buen índice analítico hubiera añadido también valor a la edición. Pero, en conjunto, la labor editorial del padre Poole me parece excelente.

Acaso sea mucho pedir a un editor que verifique la exactitud y validez de las fuentes en que se apoya la obra editada, pero en el caso presente convendría hacerlo, pues cabe la razonable sospecha de que Las Casas eche mano de sofismas, cite textos fuera de contexto o que poco vienen al caso, aduzca discutibles precedentes históricos o exagere condiciones existentes en su tiempo para cargarse más de razón en combatirlos. No sería la primera vez que el fogoso polemista recurre a piadosas distorsiones de los hechos. Por lo menos, creo que hubieran debido de presentarse al lector los correspondientes textos de Sepúlveda.

Esta necesidad de elementos de juicio era más de desear en la presente edición debido a que el estudio preliminar, escrito por Lewis Hanke, no suple tal laguna. En vez de ceñirse a un análisis profundo de la cuestión debatida en Valladolid—métodos de conquista y de predicación cristiana—considerándola en sus antecedentes, en las distintas actitudes adoptadas frente a la misma y en las soluciones que se le fueron dando, el Dr. Hanke parece que intentó ofrecernos una visión general de la política indigenista de España en América. El resultado ha sido, en mi opinión, un trabajo más bien superficial—a pesar de su riqueza informativa—un tanto incoherente y hábilmente tendencioso. Es lástima que el empeño del Dr. Hanke en ver la historia de la conquista española de América sólo a través del prisma lascasiano nuble con tanta frecuencia su buen juicio crítico. Estoy en desacuerdo con muchas de sus interpretaciones, pero sería imposible indicárlas en el limitado espacio de una reseña bibliográfica. Quizá lo haga en otra ocasión.
